# Supplementary material
Source: publisher site journal article supplement (https://www.dovepress.com/article/430183)
Supplement: Supplementary file 1 [file get_supplementary_file.php]

**Supplementary Data**

**Title:**

**How does mild asthma differ phenotypically from difficult-to-treat asthma?**

**Authors:**

Jennifer Naftel1*, Heena Mistry1,2,3,4,5*, Frances Ann Mitchell4, Jane Belson4, Mohammed Aref Kyyaly2,4, Clair Barber1,2, Hans Michael Haitchi1,2,3,6, Paddy Dennison1,2,3, Ratko Djukanovic1,2,3,6, Grégory Seumois5, Pandurangan Vijayanand2,5, Syed Hasan Arshad1,2,3,4,6, Ramesh J Kurukulaaratchy1,2,3,4

*** These authors contributed equally to this work.**

**From:**

1. National Institute for Health Research (NIHR) Southampton Biomedical Research Centre at University Hospital Southampton NHS Foundation Trust, Southampton, UK.
2. Clinical and Experimental Sciences Department, Faculty of Medicine, University of Southampton, Southampton, UK.
3. Asthma, Allergy and Clinical Immunology Department, University Hospital Southampton NHS Foundation Trust, Southampton, UK.
4. The David Hide Asthma & Allergy Research Centre, St Mary’s Hospital, Newport, Isle of Wight, UK.
5. Vijayanand Laboratory, La Jolla Institute of Immunology, San Diego, CA 92037, USA.
6. Institute for Life Sciences, University of Southampton, Southampton, UK.

**Table S1: Diagnostic Criteria Used in Clinical Practice for Comorbidities**

| **Comorbidities** | **Diagnostic Criteria** |
| --- | --- |
| Rhinitis | Physician clinical diagnosis |
| GORD | Physician clinical diagnosis |
| Obesity | Calculated as BMI ≥30 |
| Dysfunctional Breathing | Physician clinical diagnosis (supported by abnormal Nijmegen score >23) |
| Inducible Laryngeal Obstruction | Physician clinical diagnosis |
| Depression | Physician clinical diagnosis |
| Anxiety | Physician clinical diagnosis |
| Eczema | Physician clinical diagnosis |
| Nasal Polyposis | Physician clinical diagnosis and objective evidence (confirmed on fibreoptic nasoendoscopy or CT imaging of Sinuses) |
| Salicylate Sensitivity | Physician clinical diagnosis based on compatible history of reaction on exposure and consistent clinical phenotypes |
| Sulphite Sensitivity | Physician clinical diagnosis based on compatible history of reaction on exposure and consistent clinical phenotypes |
| ABPA or SAFS | Determined clinically using evidence of relevant serological and radiological information guided by conventional clinical diagnostic criteria. |
| Non-CF Bronchiectasis | Objective evidence (Radiological Features on any CT imaging of Chest including but not exclusive to HRCT) |
| COPD | Physician clinical diagnosis |

***Table S1.*** *Abbreviations: GORD= Gastro-oesophageal reflux disease, BMI = body mass index, ABPA/SAFS= Allergic bronchopulmonary aspergillosis/Severe asthma with fungal sensitisation, CF= cystic fibrosis, HRCT = high-resolution computerised tomography, COPD = Chronic Obstructive Pulmonary Disease.*

**Table S2. Comparison of the mild asthma cohort stratified by recruitment from IOWBC vs IOW clinic/community**

| **Clinical Characteristics** | **IOWBC**  **Mild Asthma**  **N = 22** | **IOW Clinic/Community**  **Mild Asthma**  **N = 45** | ***P*-value** |
| --- | --- | --- | --- |
| **Demographics** | | | |
| Sex, % *(n*)  Female  Male | 59.1 (13)  40.9 (9) | 64.4 (29)  35.6 (16) | 0.789 |
| Age at enrolment, years | 28.8 (0.4) | 43.0 (12.0) | **<0.001** |
| Body mass index, kg/m2 | 27.7 (5.8) | 27.8 (6.1) | 0.804 |
| Smoking Status, % (*n*)  Never  Current  Ex | 45.5 (10)  31.8 (7)  22.7 (5) | 48.9 (22)  15.6 (7)  35.6 (16) | 0.262# |
| Age of asthma onset, years  Missing | 6.8 (4.5)  1 | 23.5 (16.7)  1 | **<0.001** |
| Asthma duration, years  Missing | 22.2 (4.6)  1 | 19.7 (14.7)  1 | 0.441 |
| **Asthma Morbidity and Medication** | | | |
| Hospitalisations in past 12-months | 0 | 0 | ns |
| Days lost from work in past 12-months  Missing | 0.1 (0.2)  0 | 0.8 (3.0)  3 | 0.211 |
| ICS dose, μg BDP equiv.  Not on ICS | 750.0 (984.3)  17 | 758.1 (369.7)  11 | 0.114 |
| **T2 Biomarkers and Inflammometry** | | | |
| BEC, x109/L | 0.22 (0.15) | 0.22 (0.13) | 0.919 |
| BNC, x109/L | 3.4 (1.5) | 4.1 (2.0) | **0.047** |
| Total IgE, | 399.4 (656.4) | 196.8 (294.5) | 0.291 |
| FeNO, ppb | 35.0 (30.0) | 35.3 (26.8) | 0.659 |
| GINA T2-high status, % (*n/N*)  Missing | 86.4 (19)  0 | 88.4 (38/43)  2 | >0.999 |
| Atopy – no. of positive SPTs | 3.0 (2.4) | 3.6 (3.2) | 0.648 |
| **Lung Function Tests** | | | |
| Pre-BD FEV1 % pred. | 91.6 (9.2) | 91.5 (16.6) | 0.974* |
| Pre-BD FVC % pred. | 98.2 (10.4) | 100.7 (13.8) | 0.457* |
| Pre-BD FEV1/FVC % | 78.4 (7.0) | 73.5 (8.4) | **0.021*** |
| Pre-BD FEF 25-75% % pred. | 79.8 (21.2) | 77.3 (32.5) | 0.436 |
| **Comorbidity and Health and Disease-related Questionnaire Characteristics** | | | |
| Rhinitis | 86.4 (19) | 82.2 (37) | 1.000 |
| GORD | 36.4 (8) | 64.4 (29) | **0.038** |
| Obesity | 27.3 (6) | 33.3 (15) | 0.781 |
| Dysfunctional breathing | 27.3 (6) | 53.3 (24) | 0.067 |
| Depression | 68.2 (15) | 53.3 (24) | 0.298 |
| Anxiety | 59.1 (13) | 55.6 (25) | 1.000 |
| Eczema ever | 63.6 (14) | 42.2 (19) | 0.123 |
| ACQ-6 score  Missing | 0.64 (0.66)  1 | 0.74 (0.72)  1 | 0.691 |

***Table S2.*** *Categorical variables are represented as percentages (%) and frequencies (n/N); continuous variables as mean (SD). Fisher’s exact test and #Chi-squared test were applied for categorical variables, Mann Whitney U-test for non-parametric data and *unpaired t-test for parametric data. P-values <0.05 are statistically significant (in bold). Abbreviations: ICS = inhaled corticosteroids, BDP equiv.= beclomethasone dipropionate equivalent/day, BEC = blood eosinophil count, BNC = blood neutrophil count, IgE= immunoglobulin E, FeNO= fractional exhaled nitric oxide, ppb= parts per billion, GINA= Global Initiative for Asthma, T2 = type 2, SPT= skin prick test, BD= bronchodilator, FEV1= forced expiratory volume in 1 second, FVC= forced vital capacity, FEF 25-75%= forced expiratory flow between 25-75% exhalation. GORD= gastro-oesophageal reflux disease, ACQ-6= asthma control questionnaire-6.*

**Table S3: Comparison of medication use between the difficult and mild asthma cohorts**

| **Medication** | **Difficult Asthma Cohort**  **N=498** | **Mild Asthma Cohort**  **N=67** | ***P*-value** | |
| --- | --- | --- | --- | --- |
| Inhaled corticosteroid dose, μg BDP equiv. | 2588.6 (986.6) | 447.4 (263.4) | **<0.0001** | |
| Maintenance OCS use, % (*n/N*) | 30.0 (143/476) | 0 (0) | **<0.0001** | |
| Biologics at enrolment, % (*n*) | 17.1 (85) | 0 (0) | **<0.0001** | |
| Biologics post-enrolment, % (*n*) | 24.3 (121) | 0 (0) | **<0.0001** | |
| Biologics post-enrolment, % (*n*) | 24.3 (121) | 0 (0) | **<0.0001** |

***Table S3.*** *Categorical variables are represented as percentages (%) and frequencies (n/N); continuous variables as mean (SD). Fisher’s exact test was applied for categorical variables, Mann Whitney U-test for non-parametric data. P-values <0.05 are statistically significant (in bold). Abbreviations: OCS= oral corticosteroids, ICU= intensive care unit, BDP equiv.= beclomethasone dipropionate equivalent/day. Biologics include Omalizumab (anti-immunoglobulin E) and Mepolizumab (anti-interleukin-5).*

**Table S4. Comparison of** **lung function characteristics between the difficult and mild asthma cohorts**

|  | **Difficult Asthma Cohort**  **N=498** | **Mild Asthma Cohort**  **N=67** | ***P*-value** |
| --- | --- | --- | --- |
| **Lung Function Tests** |  |  |  |
| Clinic FEV1 % pred. | 71.5 (23.6) | 91.4 (14.5) | **<0.0001*** |
| Clinic FVC, % pred. | 87.6 (26.4) | 100.2 (12.6) | **<0.0001*** |
| Clinic FEV1/FVC ratio, % | 66.4 (14.5) | 74.8 (8.5) | **<0.0001** |
| Clinic FEF25-75%, % pred. | 52.9 (36.4) | 74.0 (38.0) | **<0.0001** |

***Table S4.*** *Post-bronchodilator (BD) spirometry values shown for difficult asthma and pre-BD spirometry values shown for mild asthma.**Continuous variables as mean (SD). Mann Whitney U-test for non-parametric data and *unpaired t-test for parametric data. P-values <0.05 are statistically significant (in bold). Abbreviations: FEV1= forced expiratory volume in 1 second, % pred.= percentage predicted, FVC= forced vital capacity, FEF 25-75%=* forced expiratory flow between 25-75% exhalation.

**Table S5. Comparison of clinical characteristics of difficult asthma cohort stratified by lung function (airflow limitation)**

| **Clinical Characteristics** | **Difficult Asthma Cohort**  **Post BD FEV1 <80%pred** | **Difficult Asthma Cohort**  **Post BD FEV1 ≥80%pred** | ***P*-value** |
| --- | --- | --- | --- |
| **Demographics** |  |  |  |
| Number of subjects, *(N*) | 192 | 146 |  |
| Sex, % *(n*)     Female     Male | 54.7 (105)  45.3 (87) | 77.4 (113)  22.6 (33) | **<0.0001** |
| Ethnicity, % *(n/N*)     Caucasian     Non-Caucasian | 92.2 (177)  7.8 (15) | 91.8 (134)  8.2 (12) | 0.4212 |
| Age at enrolment, years | 54.8 (14.3) | 47.8 (16.2) | **<0.0001** |
| Body mass index, kg/m2 | 30.4 (6.9)  17.2-55.6 | 30.7 (7.1)  17.6-48.8 | 0.7831 |
| Smoking Status, % (*n*)     Never     Ever | 48.4 (93)  51.6 (99) | 58.6 (85)  41.4 (60)  Missing 1 | 0.0778 |
| **Asthma History** | | | |
| Age of asthma onset, years | 23.9 (21.8)  0-77  Missing 5 | 24.6 (19.5)  0-69  Missing 6 | 0.3568 |
| Asthma duration, years | 30.4 (19.9)  0-83  Missing 5 | 22.3 (14.2)  0-77  Missing 6 | **0.0003** |

| **Healthcare Utilisation** | | | |
| --- | --- | --- | --- |
| Hospitalisations in past 12-months | 0.68 (1.6) | 1. (2.3)   Missing 2 | 0.1014 |
| OCS courses in past 12-months | 3.8 (3.7)  Missing 12 | 3.6 (3.7)  Missing 17 | 0.7701 |
| Asthma-related ICU visits ever | 0.79 (1.8) | 0.8 (2.1) | 0.4104 |
| Days lost from work in past 12-months | 20.5 (52.8)  Median 4.0  Missing 81 | 30.1 (53.7)  Median 10.0  Missing 60 | **0.0061** |
| **Medication** | | | |
| ICS dose, mcg | 2591.6 (993.9)  1000-4500  Missing 30 | 2509.4 (1065.4)  1000 – 4930  Missing 29 | 0.4989 |
| mOCS, *%* (*n/N*) | 36.4 (64/176) | 21.8 (31/142) | **0.0065** |
| Biologics at enrolment, *%* (*n*) | 19.3 (37) | 17.1 (25) | 0.6715 |

| **Blood Inflammometry** | | | |
| --- | --- | --- | --- |
| Blood eosinophil count, x 109/L | 0.27 (0.34)  Median 0.20  Missing 31 | 0.27 (0.34)  Median 0.20  Missing 29 | 0.6436 |
| Blood neutrophil count, x 109/L | 6.4 (2.7)  Median 6.0  Missing 30 | 6.0 (3.2)  Median 5.1  Missing 28 | **0.0149** |
| Total IgE, IU/L | 373.0 (696.6)  Median 95.6  Missing 37 | 209.6 (451.8)  Median 65.1  Missing 32 | 0.0597 |
| A.fumigatus-specific IgE, IU/L | 2.22 (7.95)  Median 0.00  Missing 23 | 1.14 (9.04)  Median 0.00  Missing 22 | **0.0429** |
| **Airway Inflammometry** | | | |
| FeNO, ppb | 29.9 (30.2)  Median 20.0  Missing 19 | 30.1 (33.2)  Median 19.5  Missing 14 | 0.8079 |
| Sputum eosinophils, %  *N* | 9.9 (15.2)  Median 2.0  Missing 117 | 6.7 (13.6)  Median 1.0  Missing 111 | 0.2481 |
| Sputum neutrophils, %  *N* | 44.0 (24.5)  Median 44.1  Missing 117 | 34.1 (25.2)  Median 34.8  Missing 111 | **0.0427** |
| **T2-high Inflammation** | | | |
| GINA T2-high status, % *(n/N)* | 95.7 (176/184) | 92.1 (129/140) | 0.2336 |
| **Atopy status** | | | |
| Subjects with ≥ 1 positive SPT, % *(n/N)* | 69.9 (93/133) | 64.0 (71/111) | 0.3405 |

| **Asthma Control & Health-related QoL** | | | |
| --- | --- | --- | --- |
| ACQ-6 score | 2.43 (1.35)  Median 2.50  Missing 15 | 2.44 (1.27)  Median 2.40  Missing 10 | 0.8733 |
| ACQ-6 score ≥ 1.50, % (*n/N*) | 75.7 (134/177) | 77.9 (106/136) | 0.6871 |
| EQ5D-5L Health Today VAS, % | 66.4 (18.4)  Median 70.0  Missing 100 | 61.6 (23.1)  Median 65.0  Missing 99 | 0.3452 |
| SGRQ total score | 51.4 (21.0)  Median 51.9  Missing 40 | 50.0 (21.5)  Median 50.0  Missing 28 | 0.6162 |
| **Comorbidity-related Questionnaires** | | | |
| SNOT22 score | 34.4 (21.0)  Median 31.0  Missing 65 | 36.5 (20.5)  Median 34.0  Missing 43 | 0.3561 |
| Hull Cough Hypersensitivity score | 24.8 (14.7)  Median 24.5  Missing 36 | 27.5 (16.4)  Median 26.0  Missing 28 | 0.2103 |
| Nijmegen score | 21.5 (11.8)  Median 21.0  Missing 44 | 23.2 (12.6)  Median 22.0  Missing 26 | 0.3359 |
| HADS-D score | 5.3 (4.2)  Median 4.0  Missing 25 | 5.2 (4.5)  Median 4.0  Missing 15 | 0.6596 |
| HADS-A score | 6.7 (4.8)  Median 6.0  Missing 25 | 7.1 (4.5)  Median 7.0  Missing 16 | 0.3232 |
| **Comorbidites, % (*n/N*)** |  |  |  |
| Rhinitis | 59.5 (103/173) | 73.8 (93/126) | **0.0135** |
| GORD | 66.8 (125/187) | 66.4 (95/143) | >0.9999 |
| Obesity | 46.4 (89) | 47.3 (69) | 0.9125 |
| Dysfunctional breathing | 39.8 (74/186) | 52.5 (73/139) | **0.0246** |
| Inducible laryngeal obstruction | 13.5 (24/178) | 14.8 (19/128) | 0.7416 |
| Depression | 36.7 (65/177) | 34.4 (44/128) | 0.7172 |
| Anxiety | 30.7 (54/176) | 34.1 (43/126) | 0.5347 |
| Eczema | 27.1 (52) | 30.8 (44/143) | 0.4665 |
| Nasal polyps | 24.9 (46/185) | 22.3 (31/139) | 0.6012 |
| Salicylate sensitivity | 21.1 (40/190) | 27.1 (39/144) | 0.2419 |
| Sulphite sensitivity | 6.3 (12/190) | 10.3 (15/145) | 0.2246 |
| ABPA/SAFS | 9.9 (19/191) | 5.6 (8/143) | 0.1617 |
| Non-CF bronchiectasis | 19.4 (37/191) | 6.3 (9/144) | **0.0006** |
| COPD | 17.8 (34/191) | 4.2 (6/144) | **0.0001** |

***Table S5.*** *Categorical variables are represented as percentages (%) and frequencies (n/N); continuous variables as mean (SD). Fisher’s exact test was applied for categorical variables, Mann Whitney U-test for non-parametric data. P-values <0.05 are statistically significant (in bold). Abbreviations: OCS =oral corticosteroids, ICU= intensive care unit, ICS= inhaled corticosteroid, mOCS= maintenance oral corticosteroids, IgE= immunoglobulin E, A.fumigatus= Aspergillus fumigatus, FeNO= fractional exhaled nitric oxide, GINA= Global Initiative for Asthma, T2= T helper 2, SPT= skin prick test, ACQ-6= asthma control questionnaire-6, EQ5D-5L= EuroQoL5D-5L, VAS= visual analogue scale, SGRQ= St George’s respiratory questionnaire, SNOT22= sino-nasal outcome test-22, HADS-D= hospital anxiety and depression scale-depression component, HADS-A= hospital anxiety and depression scale-anxiety component, GORD= gastro-oesophageal reflux, ABPA/SAFS= allergic bronchopulmonary aspergillosis/severe asthma with fungal sensitisation, CF= cystic fibrosis, COPD= chronic obstructive pulmonary disease. Biologics at enrolment include Omalizumab (anti-IgE) and Mepolizumab (anti-IL-5).*

**Table S6. Comparison of atopy characteristics between difficult and mild asthma cohorts based on allergy skin tests**

| **Atopy Characteristics** | **Difficult Asthma Cohort**  **N=498** | **Mild Asthma Cohort**  **N=67** | ***P*-value** |
| --- | --- | --- | --- |
| Any aeroallergen positive SPT*, %* (*N*) | 68.3 (265/380) | 73.8 (48/65) | 0.5588 |
| **Positive Allergy Skin Tests*, %* (*N*)** | | | |
| Aspergillus fumigatus | 15.8 (56/354) | 4.6 (3/65) | **0.0183** |
| Alternaria tenuis | 15.9 (54/339) | 12.3 (8/65) | 0,5741 |
| Cladosporium herbarum | 12.3 (35/284) | 70.8 (46/65) | **<0.0001** |
| Grass mix pollen | 43.4 (155/357) | 47.7 (31/65) | 0.5874 |
| Birch pollen | 24.3 (87/358) | 13.8 (9/65) | 0.0762 |
| Weed mix pollen | 18.7 (58/310) | 18.5 (12/65) | >0.9999 |
| Dermatophagoides pteronyssinus | 48.5 (174/359) | 61.5 (40/65) | 0.0594 |
| Dermatophagoides farinae | 37.0 (129/349) | 56.9 (37/65) | **0.0036** |
| Feathers | 6.8 (21/311) | 10.8 (7/65) | 0.2963 |
| Cat fur | 38.8 (139/358) | 35.4 (23/65) | 0.6780 |
| Dog dander | 31.9 (112/351) | 33.8 (22/65) | 0.7737 |
| Horse dander | 19.6 (54/276) | 23.1 (15/65) | 0.4984 |
| Rabbit | 13.6 (37/272) | 10.8 (7/65) | 0.6830 |

***Table S6.*** *Categorical variables are represented as percentages (%) and frequencies (n/N). Fisher’s exact test was applied for categorical variables. P-values <0.05 are statistically significant (in bold). Abbreviations: SPT= skin prick test.*

**Table S7. Comparison of** **comorbidity characteristics between the difficult and mild asthma cohorts**

|  | **Difficult Asthma Cohort**  **N=498** | **Mild Asthma Cohort**  **N=67** | ***P*-value** |
| --- | --- | --- | --- |
| **Comorbidities, % (*n/N*)** | | | |
| Rhinitis | 67.6 (300/444) | 83.6 (56) | **0.0068** |
| GORD | 65.1 (315/484) | 55.2 (37) | 0.1353 |
| Obesity | 48.6 (239/492) | 31.3 (21) | **0.0089** |
| Dysfunctional breathing | 48.6 (230/473) | 44.8 (30) | 0.6024 |
| Inducible laryngeal obstruction | 14.6 (65/444) | 6.0 (4) | 0.0554 |
| Depression | 36.5 (165/452) | 58.2 (39) | **0.0012** |
| Anxiety | 32.7 (147/449) | 56.7 (38) | **0.0002** |
| Eczema ever | 25.8 (127/492) | 49.3 (33) | **0.0001** |
| Nasal polyps ever | 23.4 (109/466) | 9.1 (6/66) | **0.0064** |
| Salicylate sensitivity ever | 25.0 (123/492) | 7.5 (5) | **0.0009** |
| Sulphite sensitivity ever | 7.8 (38/490) | 7.5 (5) | >0.9999 |
| ABPA/SAFS ever | 6.7 (33/490) | 0 (0) | **0.0238** |
| Non-CF bronchiectasis | 14.2 (70/492) | 0 (0) | **0.0001** |
| COPD ever | 10.1 (50/493) | 0 (0) | **0.0022** |
| **Multimorbidity** | | | |
| Multimorbidity Count | 4.0 | 4.0 | *ns* |

***Table S7.*** *Comorbidities are represented as percentages (%) and frequency out of total number (n/N). Multimorbidity count is represented as median value. Fisher’s exact test was applied for categorical variables and Mann Whitney U test for non-parametric data. P-values <0.05 are statistically significant (in bold). Abbreviations: GORD= gastro-oesophageal reflux disease, ABPA/SAFS= allergic bronchopulmonary aspergillosis/severe asthma with fungal sensitisation, CF= cystic fibrosis, COPD= chronic obstructive pulmonary disease.*
